# Supplementary material for: Exploring the Effect of Resins of Different Origin on the Structure, Dynamics and Curing Characteristics of SBR Compounds
Source: MDPI journal article supplement (doi:10.3390/polym16060834), 2024-03-18
Supplement: s1 [file s1]

# Exploring the Effect of Resins of Different Origin on the Structure, Dynamics and Curing Characteristics of SBR Compounds

Michele Pierigé <sup>1</sup>, Francesca Nardelli <sup>2,\*</sup>, Lucia Calucci <sup>2,3</sup>, Mattia Cettolin <sup>4</sup>, Luca Giannini <sup>4</sup>, Andrea Causa <sup>4</sup>, Francesca Martini <sup>1,3,\*</sup> and Marco Geppi <sup>1,2,3</sup>

<sup>1</sup> Dipartimento di Chimica e Chimica Industriale, Università di Pisa, 56124 Pisa, Italy; michele.pierige@phd.unipi.it (M.P.); marco.geppi@unipi.it (M.G.)

<sup>2</sup> Istituto di Chimica dei Composti OrganoMetallici, Consiglio Nazionale delle Ricerche, 56124 Pisa, Italy; lucia.calucci@pi.iccom.cnr.it

<sup>3</sup> Centro per l'Integrazione della Strumentazione Scientifica dell'Università di Pisa (CISUP), 56126 Pisa, Italy

<sup>4</sup> Pirelli Tyre SpA, 20126 Milano, Italy; mattia.cettolin@pirelli.com (M.C.); luca.giannini@pirelli.com (L.G.); andrea.causa@pirelli.com (A.C.)

\* Correspondence: francesca.nardelli@pi.iccom.cnr.it (F.N.); francesca.martini@unipi.it (F.M.)

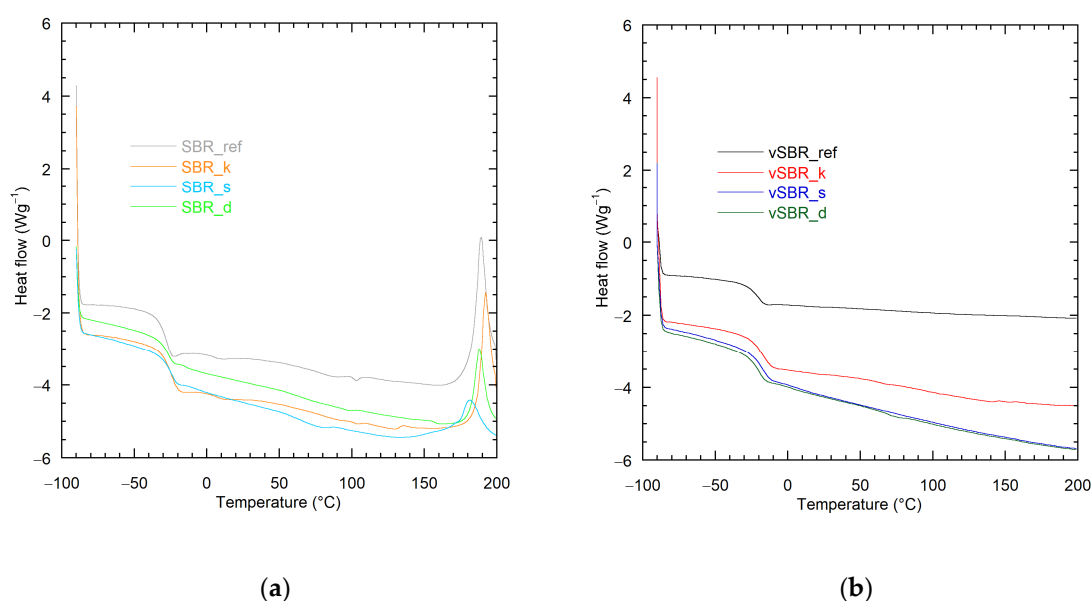

**Figure S1.** DSC curves of the investigated uncured (a) and cured (b) samples.

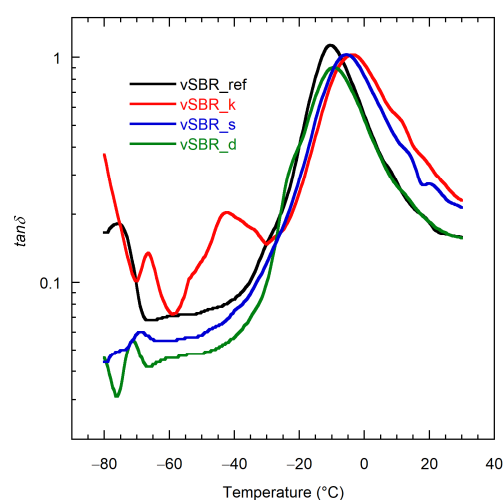

**Figure S2.** DMA temperature sweep curves of cured samples.

**Table S1.** Modulus at 10, 20, 50, 100, 200 and 300% of elongation (M10, M20, M50, M100, M200 and M300), tensile strength at break ( $TS_b$ ), elongation at break ( $E_b$ ) and stored energy density at rupture (SEDR) of cured samples.

|          | M10<br>(MPa) | M20<br>(MPa) | M50<br>(MPa) | M100<br>(MPa) | M200<br>(MPa) | M300<br>(MPa) | $TS_b$<br>(MPa) | $E_b$<br>(%) | SEDR<br>(MJ/m <sup>3</sup> ) |
|----------|--------------|--------------|--------------|---------------|---------------|---------------|-----------------|--------------|------------------------------|
| vSBR_ref | 0.4          | 0.58         | 1.01         | 1.95          | 5.99          | 11.53         | 17              | 394          | 26.86                        |
| vSBR_k   | 0.37         | 0.53         | 0.9          | 1.68          | 4.77          | 9.29          | 17.97           | 467          | 33.48                        |
| vSBR_d   | 0.57         | 0.72         | 1.06         | 1.64          | 3.53          | 6.21          | 18.6            | 616          | 44.35                        |
| vSBR_s   | 0.38         | 0.51         | 0.79         | 1.27          | 3.18          | 6.35          | 18.17           | 562          | 38.5                         |

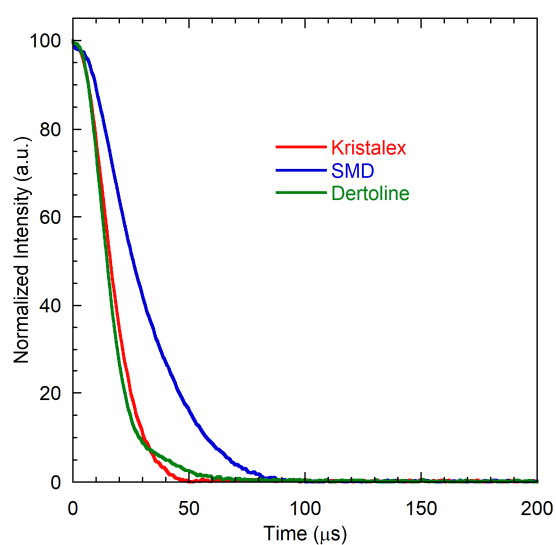

**Figure S3.** <sup>1</sup>H FIDs of the indicated resins at 303 K.

**Table S2.** Best fit parameters obtained by a biexponential fitting of the experimental  $^1\text{H}$   $T_{1\rho}$  recovery curves of the pure resins and SBR compounds at different temperatures ( $T$ , K). For each exponential component, the corresponding weight ( $W_i$ , %) and  $T_{1\rho}$  ( $T_{1\rho,i}$ , ms) values found from the fitting are reported.

| Sample          | $T$ | $W_a$ | $W_b$ | $T_{1\rho,a}$ | $T_{1\rho,b}$ |
|-----------------|-----|-------|-------|---------------|---------------|
| vSBR_ref        | 293 | 89    | 11    | 0.6           | 4.9           |
|                 | 303 | 83    | 17    | 0.7           | 4.4           |
|                 | 313 | 73    | 27    | 0.9           | 5.0           |
|                 | 323 | 64    | 36    | 1.3           | 6.6           |
|                 | 333 | 53    | 47    | 1.7           | 8.7           |
|                 | 343 | 43    | 57    | 2.3           | 11.0          |
| vSBR_k          | 293 | 90    | 10    | 0.6           | 5.7           |
|                 | 303 | 87    | 13    | 0.6           | 4.9           |
|                 | 313 | 79    | 21    | 0.7           | 4.4           |
|                 | 323 | 70    | 30    | 1.0           | 5.1           |
|                 | 333 | 60    | 40    | 1.3           | 6.6           |
|                 | 343 | 50    | 50    | 1.6           | 8.4           |
| vSBR_d          | 293 | 86    | 14    | 0.6           | 7.5           |
|                 | 303 | 83    | 17    | 0.7           | 6.5           |
|                 | 313 | 77    | 23    | 0.9           | 5.9           |
|                 | 323 | 67    | 33    | 1.1           | 6.3           |
|                 | 333 | 56    | 44    | 1.5           | 7.6           |
|                 | 343 | 45    | 55    | 1.8           | 9.4           |
| vSBR_s          | 293 | 85    | 15    | 0.6           | 4.8           |
|                 | 303 | 82    | 18    | 0.7           | 4.2           |
|                 | 313 | 75    | 25    | 0.8           | 4.1           |
|                 | 323 | 68    | 32    | 1.0           | 4.9           |
|                 | 333 | 59    | 41    | 1.4           | 6.3           |
|                 | 343 | 50    | 50    | 1.7           | 8.2           |
| Dertoline MG    | 293 | 8     | 92    | 1.5           | 16.9          |
|                 | 303 | 7     | 93    | 2.2           | 18.8          |
|                 | 313 | 7     | 93    | 2.5           | 20.8          |
|                 | 323 | 6     | 94    | 2.0           | 22.8          |
|                 | 333 | 6     | 94    | 1.8           | 24.8          |
|                 | 343 | 6     | 94    | 1.4           | 25.9          |
| SMD-31144       | 293 | 3     | 97    | 1.0           | 33.5          |
|                 | 303 | 4     | 96    | 2.1           | 35.6          |
|                 | 313 | 4     | 96    | 3.0           | 37.5          |
|                 | 323 | 5     | 95    | 3.3           | 38.6          |
|                 | 333 | 4     | 96    | 1.5           | 37.9          |
|                 | 343 | 4     | 96    | 1.8           | 37.5          |
| Kristalex™ 5140 | 293 | 8     | 92    | 1.4           | 7.7           |
|                 | 303 | 8     | 92    | 1.3           | 8.1           |
|                 | 313 | 7     | 93    | 1.3           | 8.3           |
|                 | 323 | 8     | 92    | 1.2           | 8.3           |
|                 | 333 | 8     | 92    | 1.3           | 8.3           |
|                 | 343 | 9     | 91    | 1.3           | 8.2           |

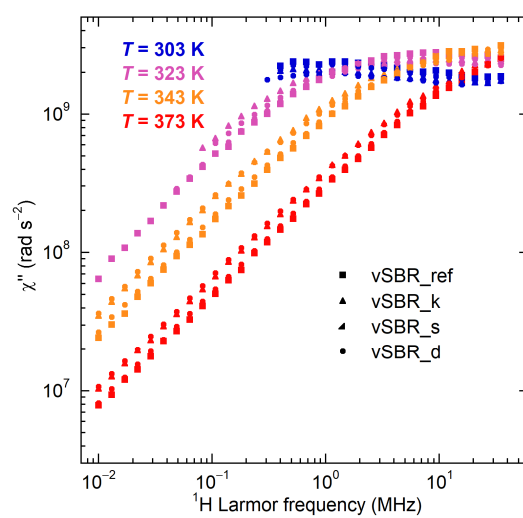

**Figure S4.**  $\chi''(\omega)$  curves at different temperatures of the cured SBR compounds.
